# Supplementary material for: miR-299a-5p is a novel mediator of fibrosis in diabetic kidney disease through its regulation of antifibrotic proteins follistatin and cripto-1
Source: Research Square preprint supplement (doi:10.21203/rs.3.rs-5419387/v1), 2025-05-18
Supplement: Supplementary file 1 [file 19f896e738ddb9a720cfa1be.pdf]

# Supplementary Fig 3:

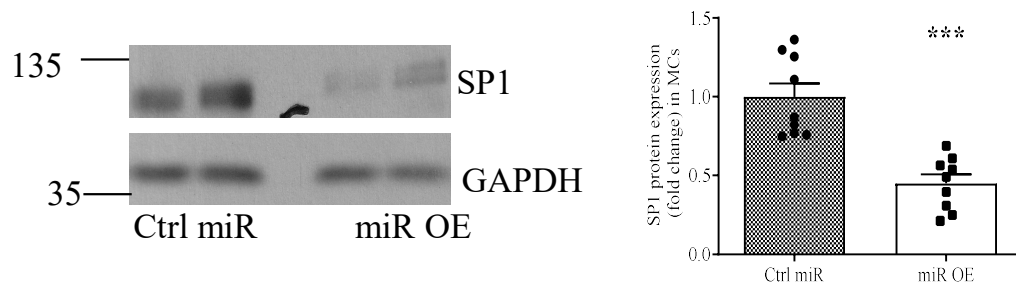

**Supplementary Figure 3: miR-299a-5p overexpression inhibits SP1 expression.** MiR-299a-5p overexpression in MC reduced SP1 expression as assessed by immunoblotting of whole cell lysate (\*\*p<0.01).
