# Supplementary material for: miR-299a-5p is a novel mediator of fibrosis in diabetic kidney disease through its regulation of antifibrotic proteins follistatin and cripto-1
Source: Research Square preprint supplement (doi:10.21203/rs.3.rs-5419387/v1), 2025-05-18
Supplement: Supplementary file 2 [file 22bb5696642eeeb6ddf94a56.pdf]

# Supplementary Fig 1:

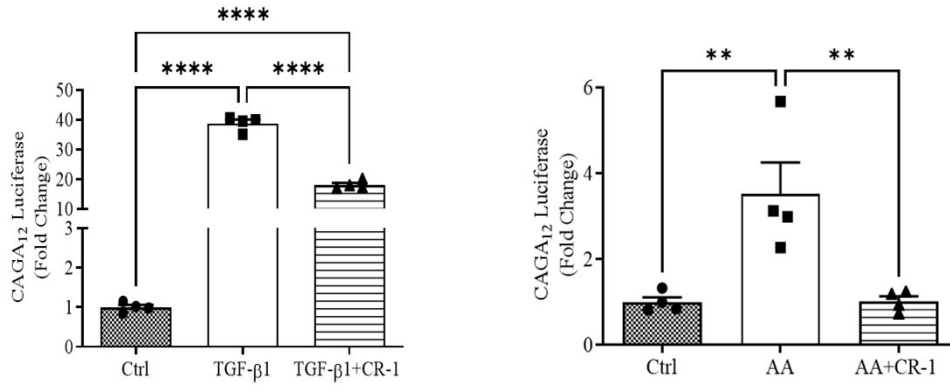

**Supplementary Figure 1: Cripto-1 attenuates TGFβ1 and act A signalling.** Cripto-1 (1μg/ml) attenuated Smad3 transcriptional activation induced by **(A)** TGFβ1 (0.5ng/ml) and **(B)** actA (2ng/ml) as measured by CAGA<sub>12</sub>-luciferase activity (\*\*p<0.01, \*\*\*\*p<0.0001).
