# Supplementary material for: miR-299a-5p is a novel mediator of fibrosis in diabetic kidney disease through its regulation of antifibrotic proteins follistatin and cripto-1
Source: Research Square preprint supplement (doi:10.21203/rs.3.rs-5419387/v1), 2025-05-18
Supplement: Supplementary file 3 [file bb9ab28141295cbdb3bc4939.pdf]

# Supplementary Figure 2:

**A**

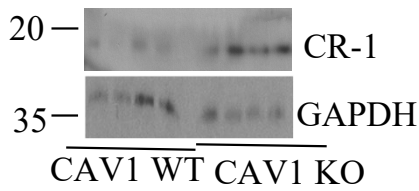

**B**

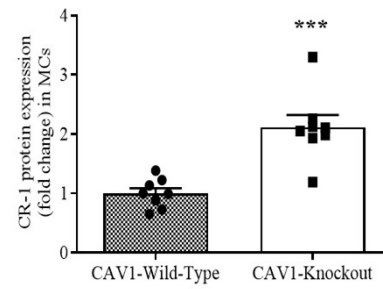

**C**

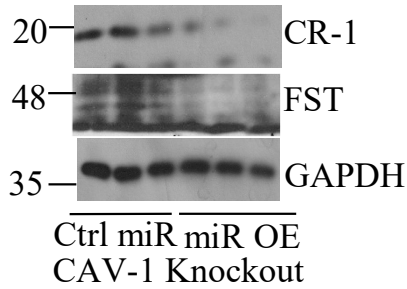

**D**

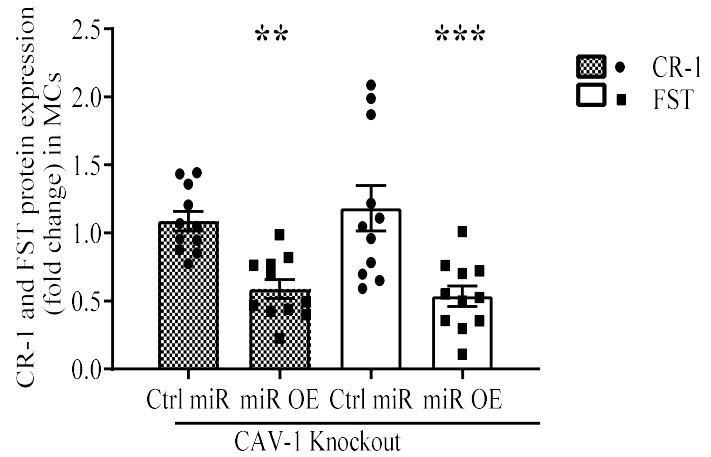

**E**

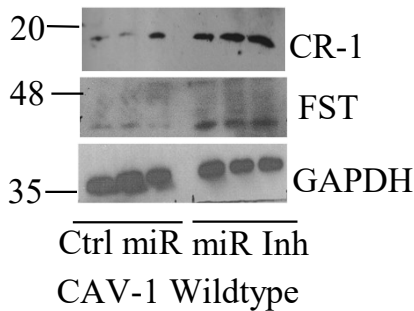

**F**

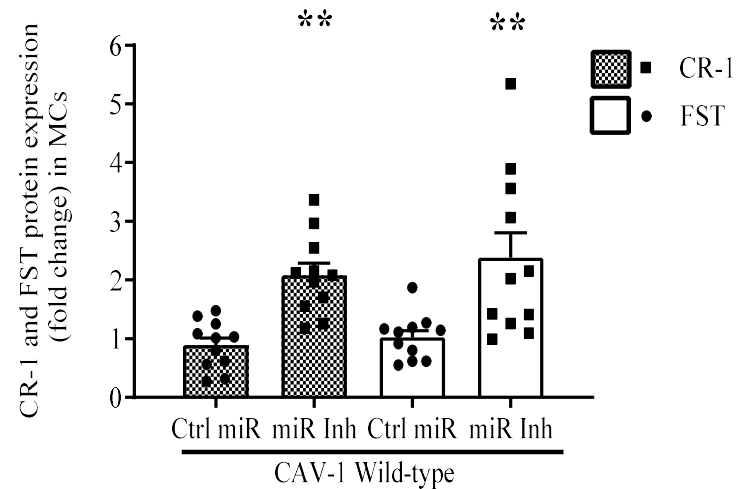

## Supplementary Figure 2: miR-299a-5p is increased in caveolin-1 knockout MC.

**A-B)** Cripto-1 protein expression was increased in cav-1 KO MC. **C-D)** miR-299a-5p overexpression reduced cripto-1 and FST protein expression in cav-1 KO MC. **E-F)** miR-299a-5p inhibition increased cripto-1 and FST protein expression in cav-1 WT MC (\*\*p < 0.01, \*\*\*p < 0.001).
