# Supplementary material for: miR-299a-5p is a novel mediator of fibrosis in diabetic kidney disease through its regulation of antifibrotic proteins follistatin and cripto-1
Source: Research Square preprint supplement (doi:10.21203/rs.3.rs-5419387/v1), 2025-05-18

## Figure 2C & Figure 2I

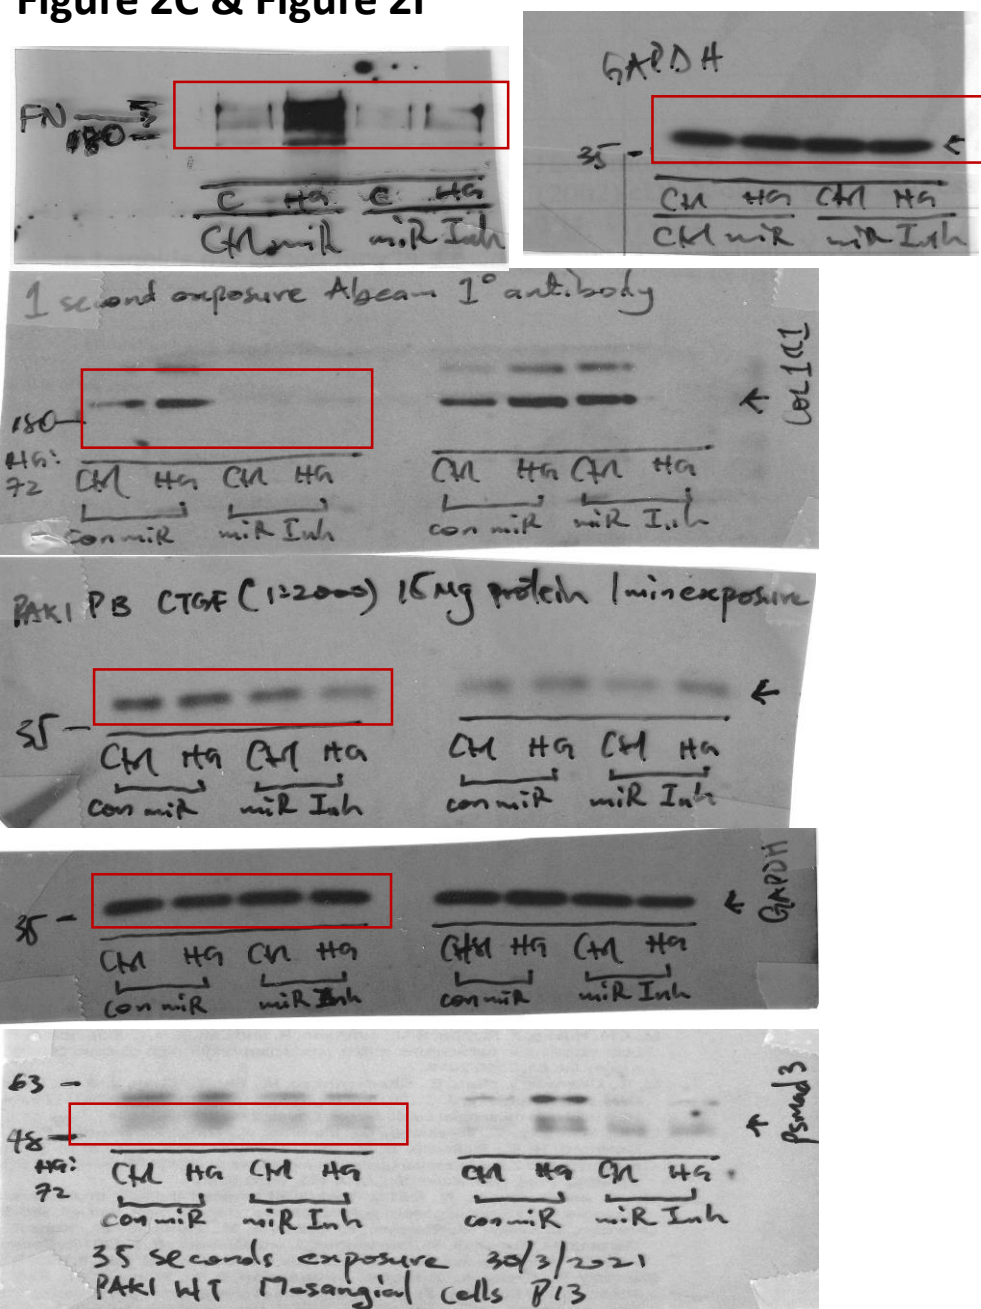

### Figure 2G & Figure 2L

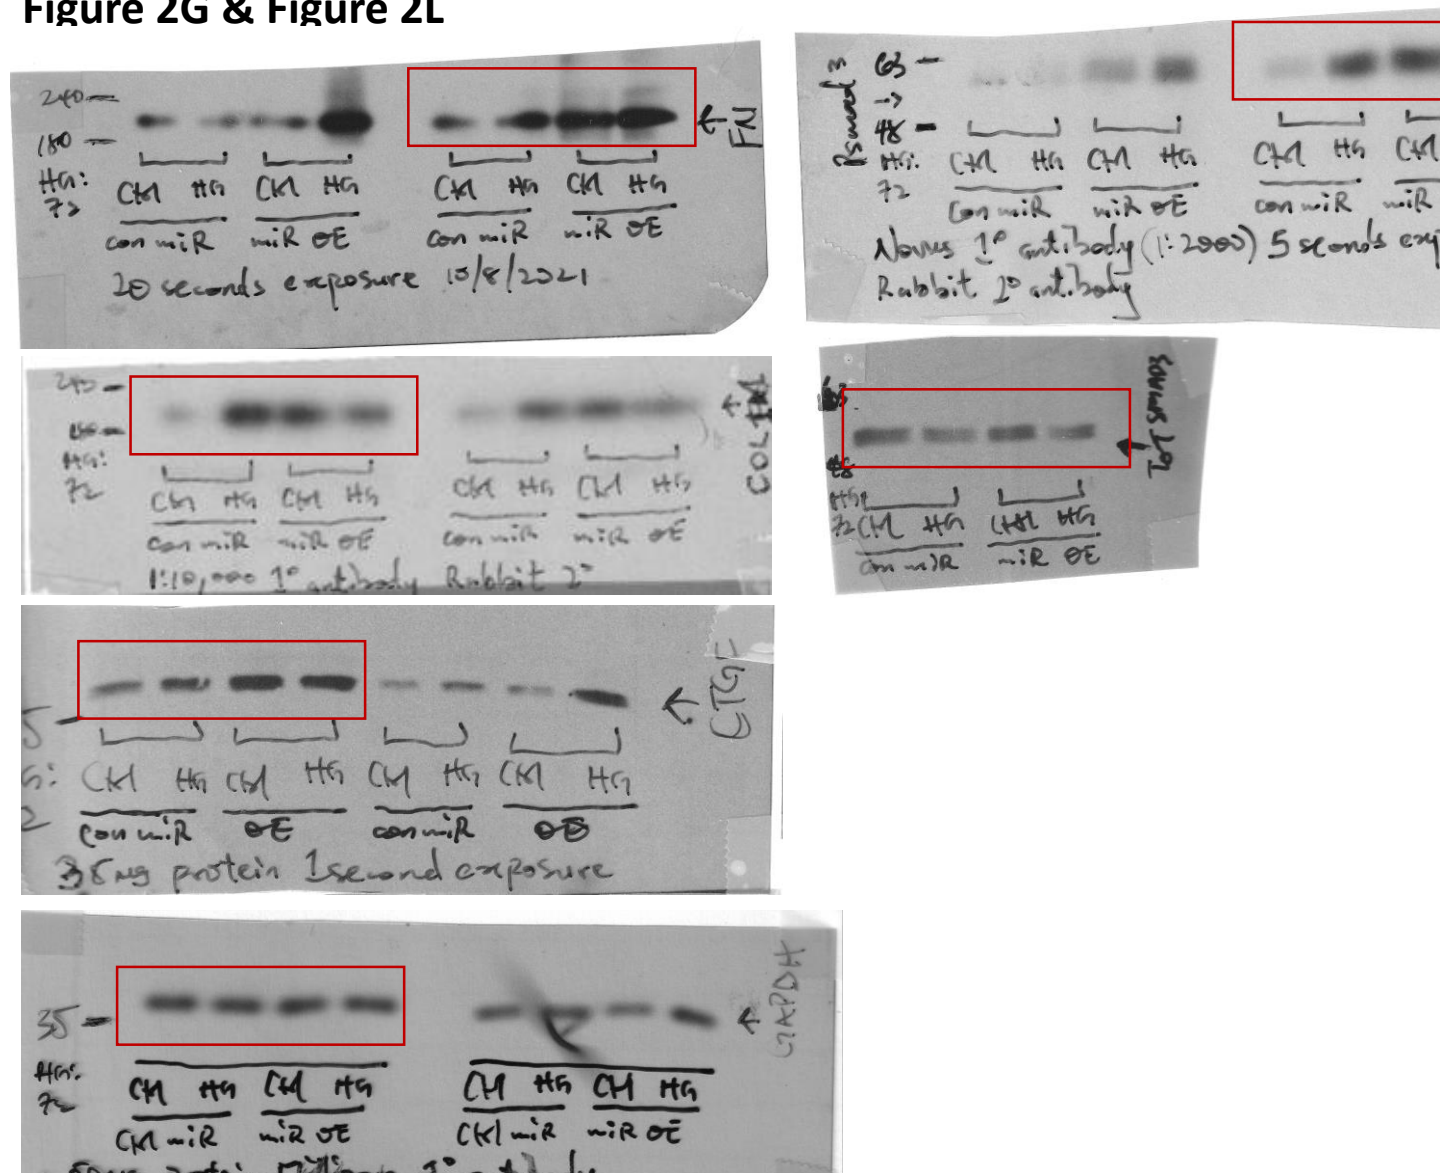

Figure 3E

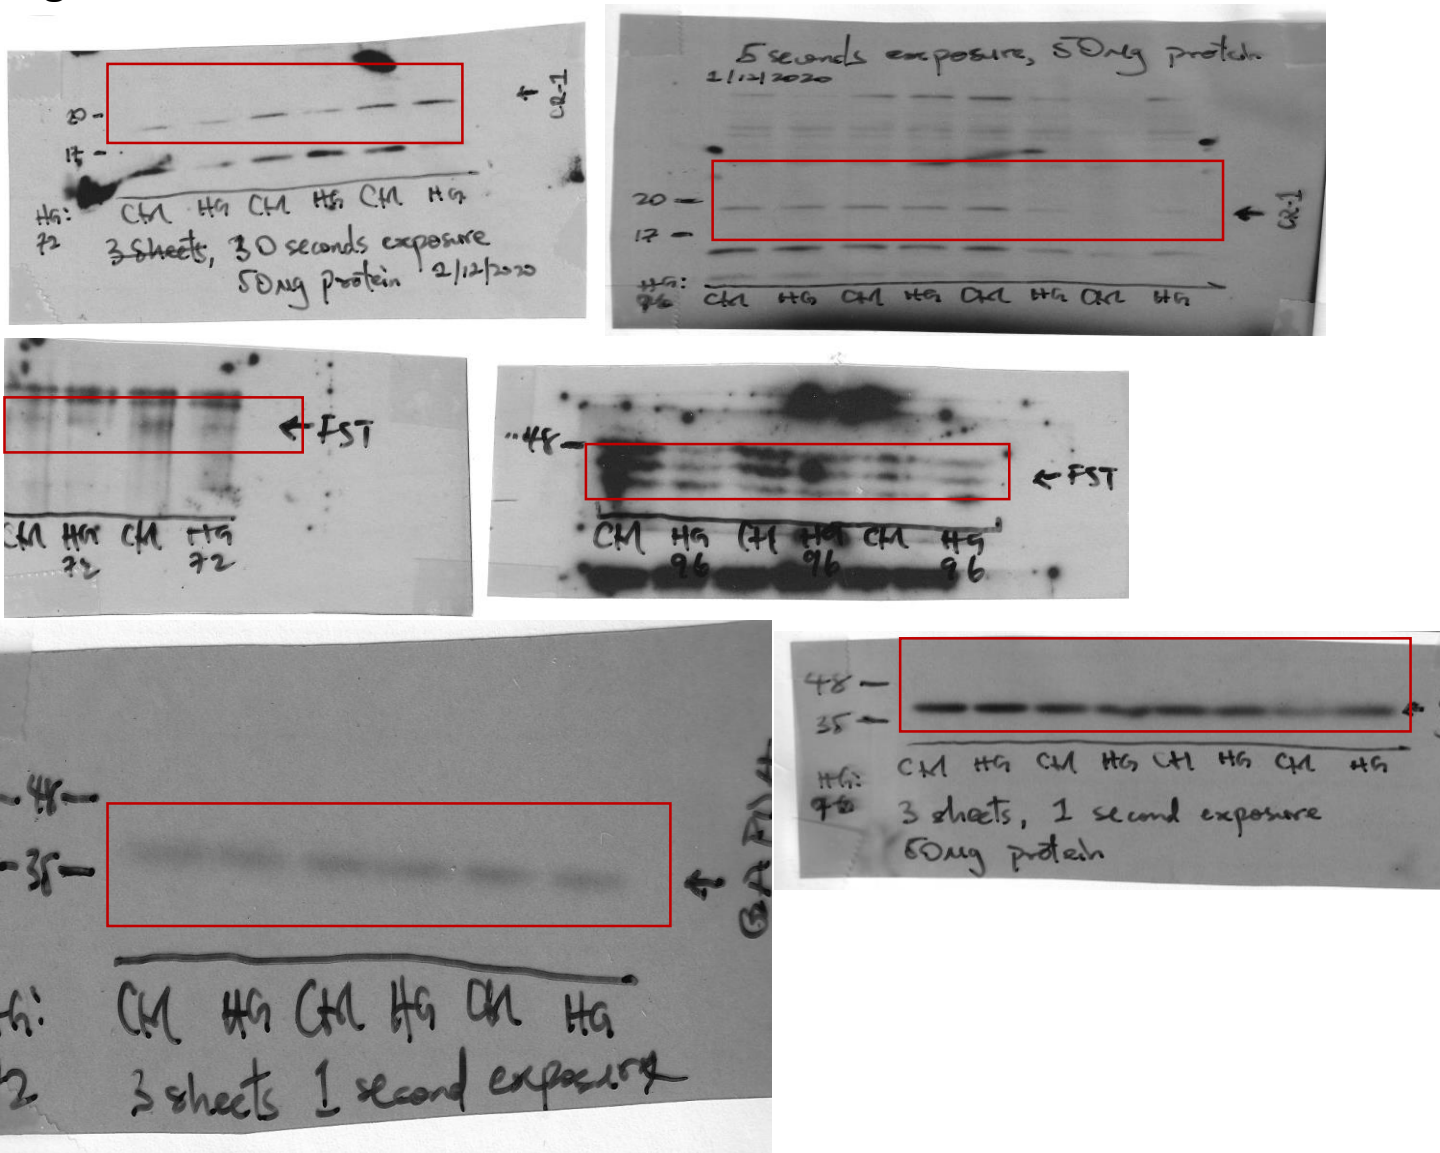

Figure 3G

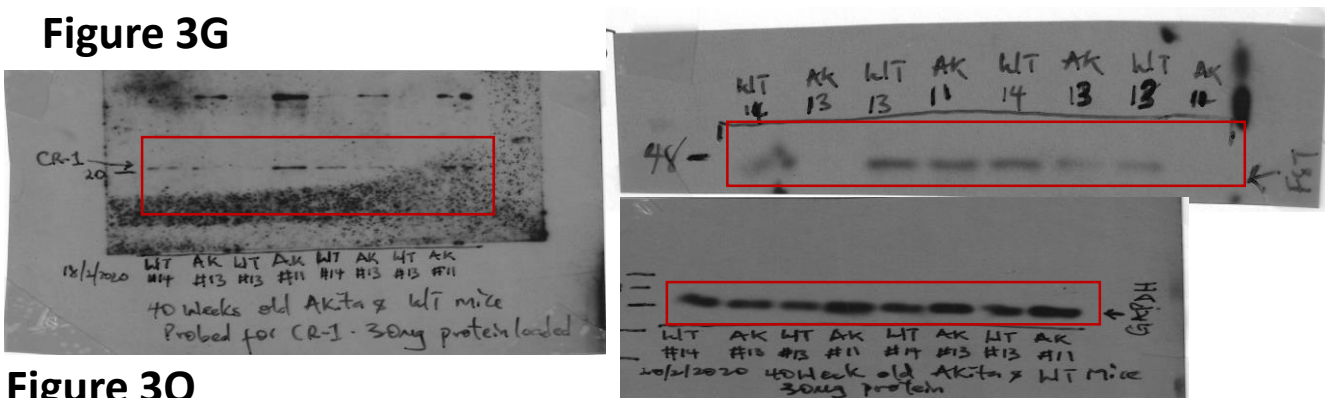

Figure 3O

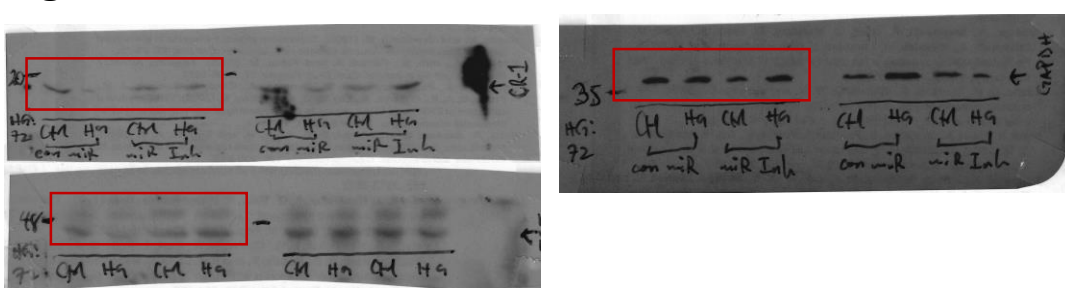

Figure 3Q

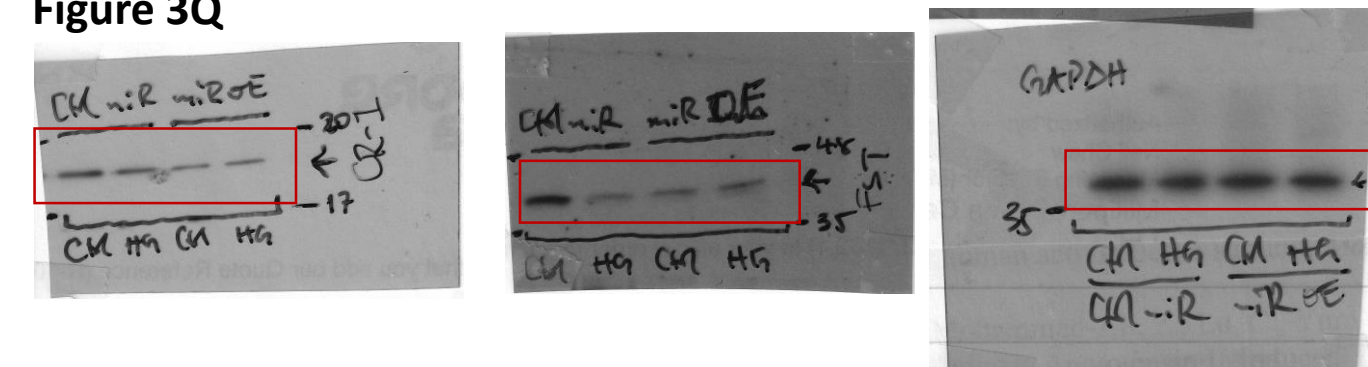



Figure 4A

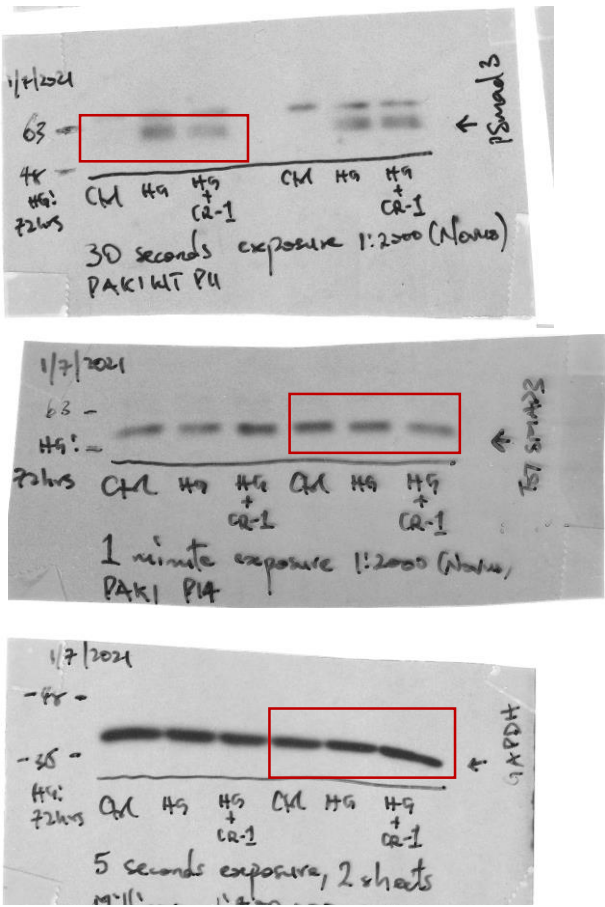

Figure 4E

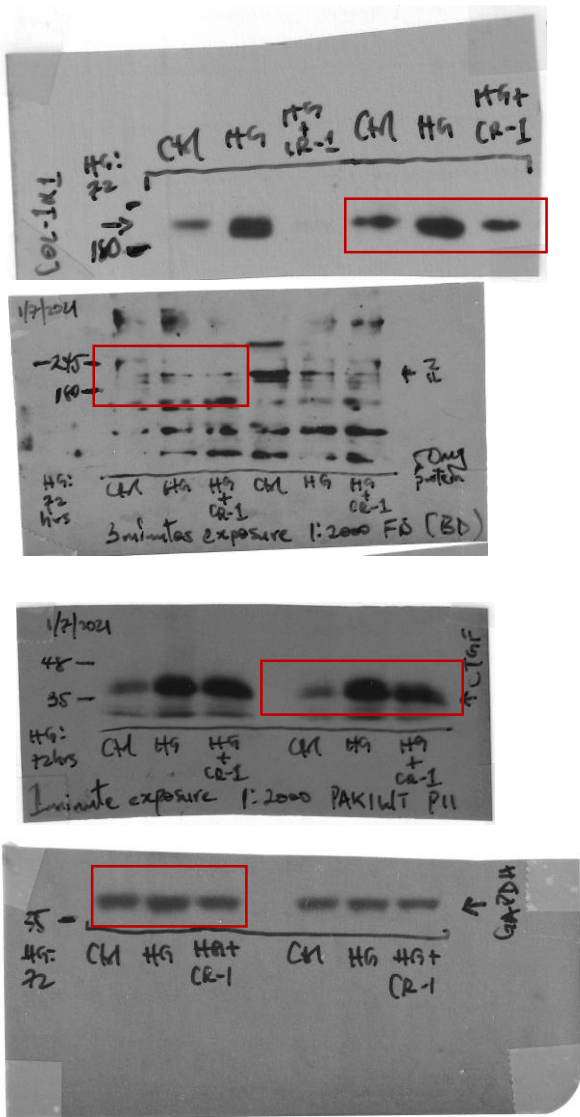

Figure 5

A

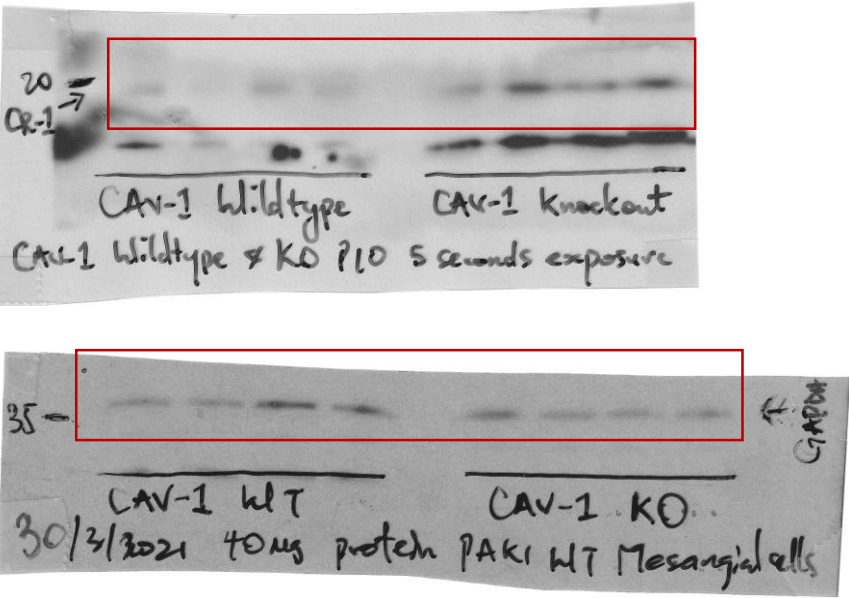

C

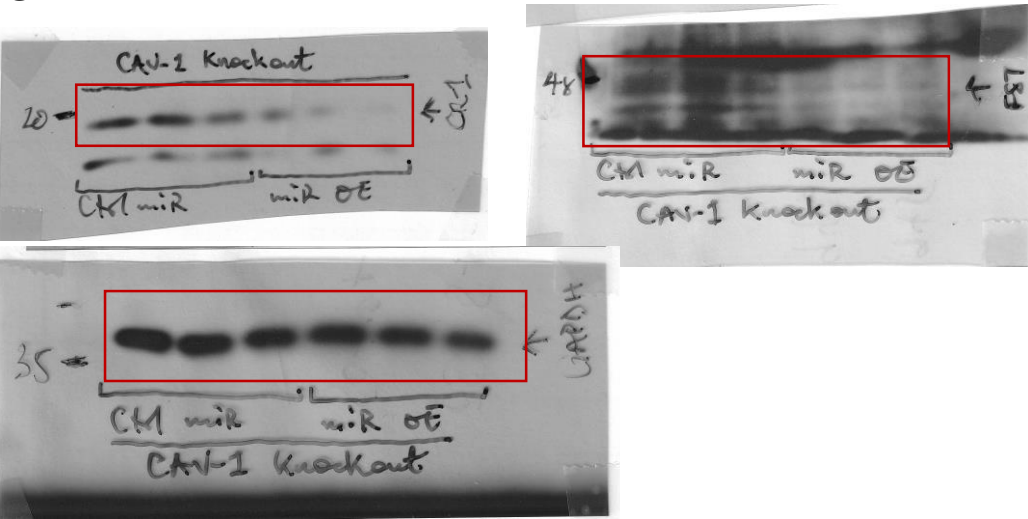

E

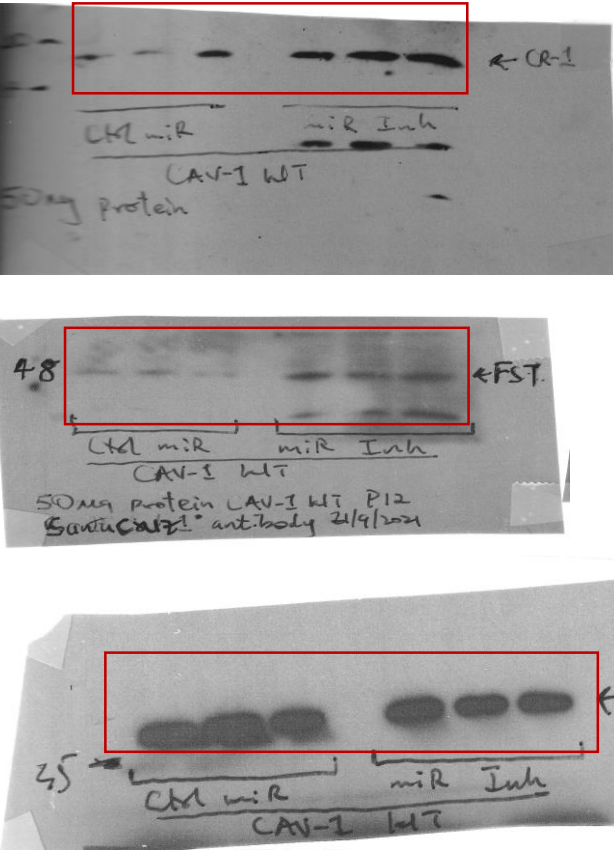

Figure 6B, 7F&8A Animal blots from miR DKD study

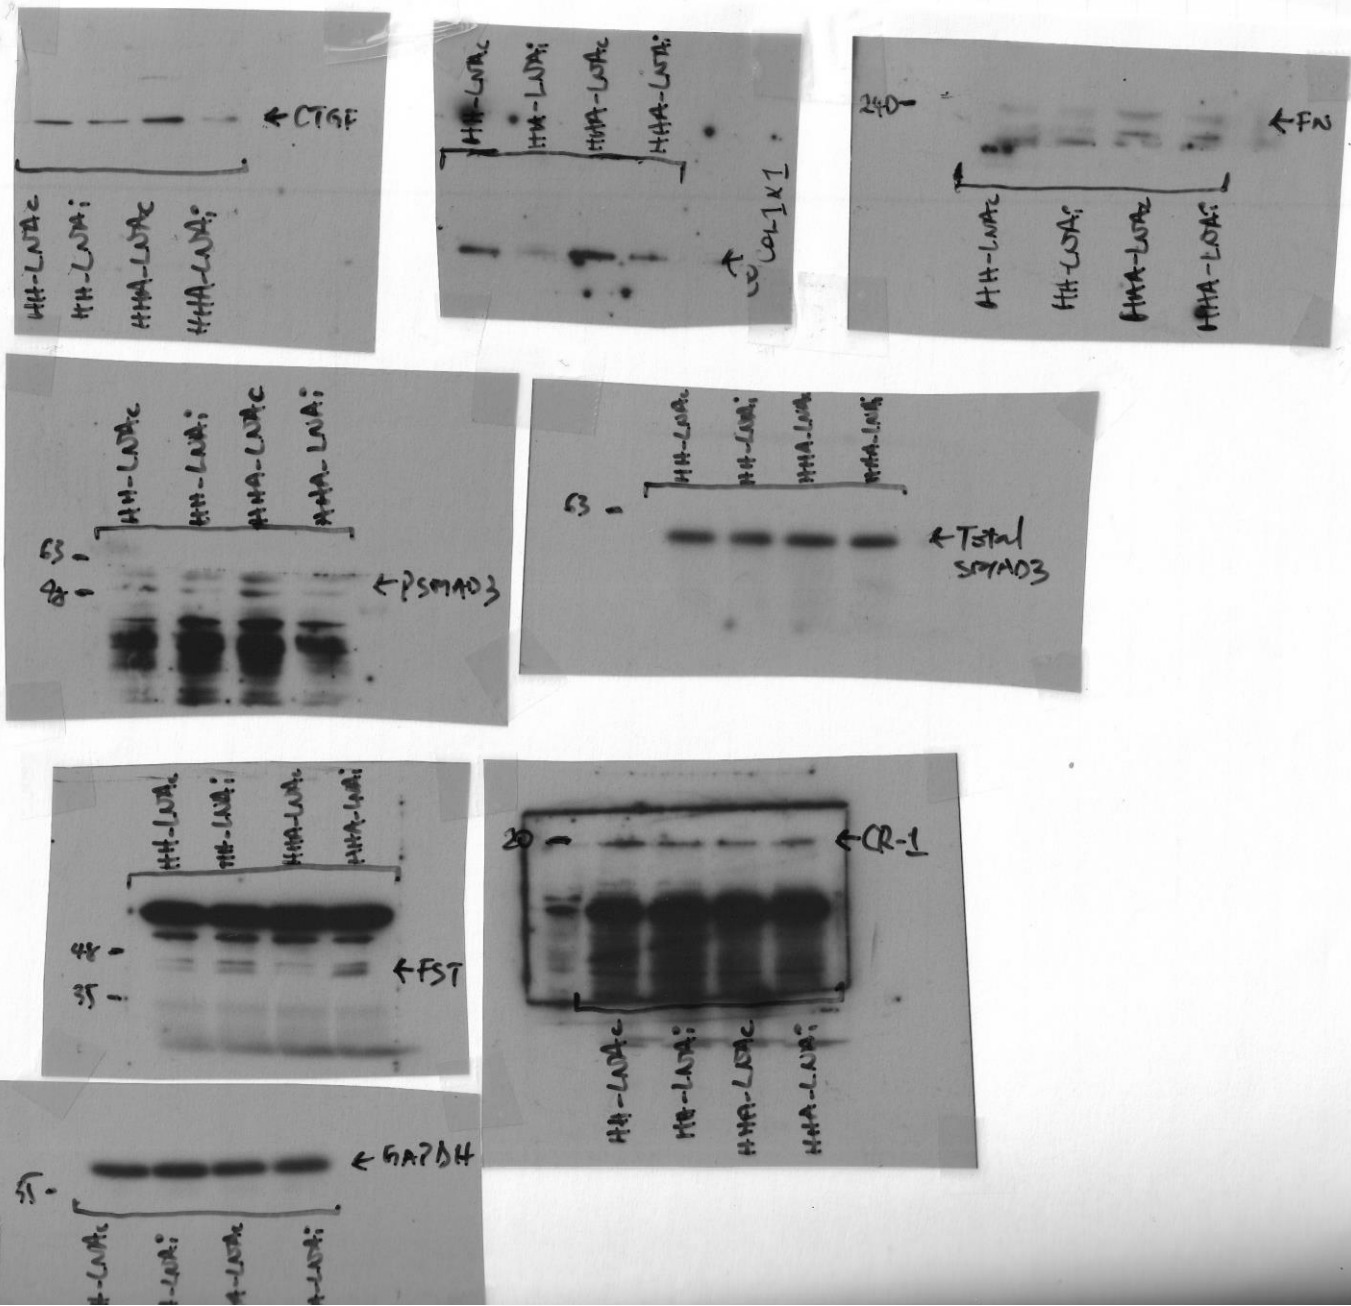

Supplement: Supplementary file 4 [file e35fa96970be24521185db4c.pdf]
